# Supplementary material for: Glass Transition in Rice Pasta as Observed by Combined Neutron Scattering and Time-Domain NMR
Source: MDPI journal article supplement (doi:10.3390/polym13152426), 2021-07-23
Supplement: s1 [file s1]

# Glass Transition in Rice Pasta as Observed by Combined Neutron Scattering and Time-Domain NMR

Magdalena Witek <sup>1</sup>, Maciej Krzystyniak <sup>2,\*</sup>, Giovanni Romanelli<sup>2</sup> and Teresa Witzak <sup>3</sup>

<sup>1</sup> Department of Biotechnology and General Technology of Food, Faculty of Food Technology, University of Agriculture in Krakow, Balicka 122, 30-149 Krakow, Poland

<sup>2</sup> ISIS Facility, Rutherford Appleton Laboratory, Chilton, Didcot, OX11 0QX, United Kingdom

<sup>3</sup> Department of Engineering and Machinery for Food Industry, Faculty of Food Technology, University of Agriculture in Krakow, Balicka 122, 30-149 Krakow, Poland

\* Correspondence matthew.krzystyniak@stfc.ac.uk; Tel.: +44 78-25-307-959

## Content

**Figure S1.** DSC thermograms showing glass transition of rice pasta samples of different moisture content.

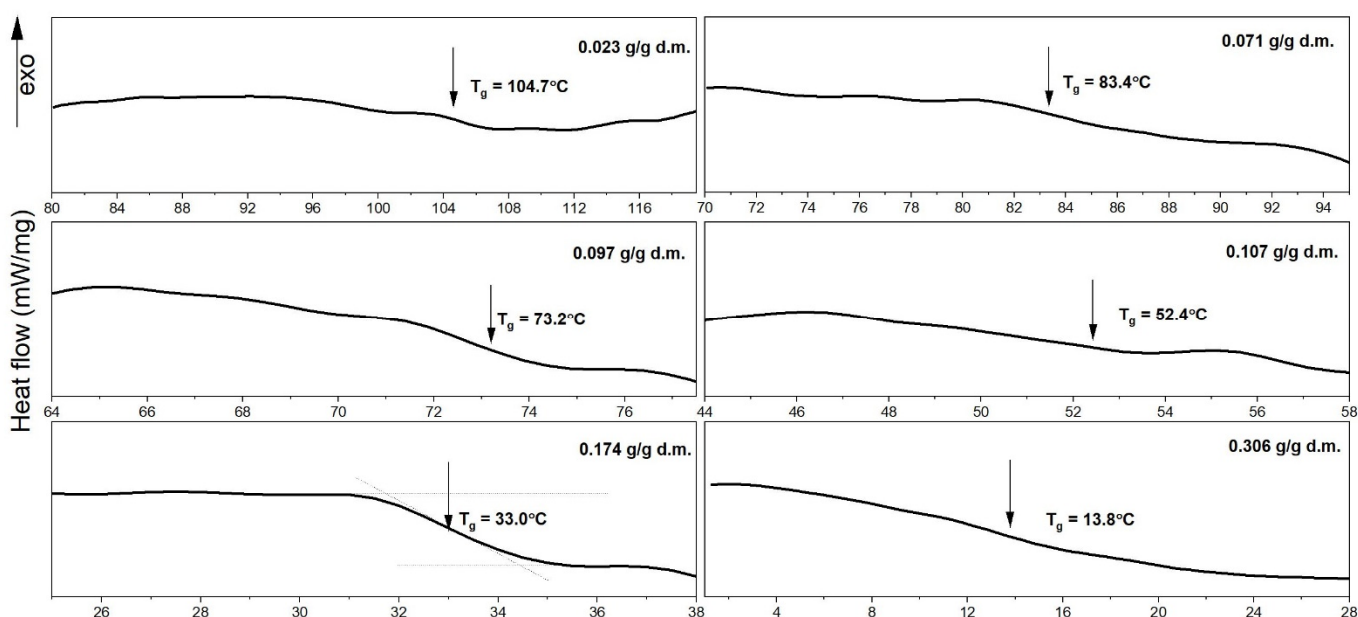

**Figure S1.** DSC thermograms showing glass transition of rice pasta samples of different moisture content.
